# Supplementary material for: Emotional intelligence assessment in a graduate entry medical school curriculum
Source: PubMed Central journal article supplement (PMC3599294; doi:10.1186/1472-6920-13-38), 2013-03-07
Supplement: 1472-6920-13-38-S1.pdf [file 1472-6920-13-38-S1.pdf]

Additional file 1: An outline of the Personal and Professional Development course

| Session title     | Teaching methods                                                                                   | Content                                                                                                                                                                                                                                                                                                                                                                                                                                                                                                     | Assessment methods                                                                                                           | Teaching staff                                                                         |
|-------------------|----------------------------------------------------------------------------------------------------|-------------------------------------------------------------------------------------------------------------------------------------------------------------------------------------------------------------------------------------------------------------------------------------------------------------------------------------------------------------------------------------------------------------------------------------------------------------------------------------------------------------|------------------------------------------------------------------------------------------------------------------------------|----------------------------------------------------------------------------------------|
| Professionalism 1 | Small group work and presentation to class                                                         | Task for discussion in small groups: You have 30 minutes to consider the following questions. Present your answers as a PowerPoint presentation.<br>Q1. Decide on a definition of professionalism which you believe is relevant for the medical profession in the 21 <sup>st</sup> century.<br>Q2. List some examples of medical student behaviour which does/does not demonstrate professionalism<br>Q3. What strategies do you think would help to facilitate medical students' sense of professionalism? | Eportfolio                                                                                                                   | Senior Lecturer/Clinical Psychologist, Clinical tutor/Physician, Clinical skills tutor |
| Professionalism 2 | Didactic presentation                                                                              | Demonstration of eportfolio and explanation of case uploads and reflective diary                                                                                                                                                                                                                                                                                                                                                                                                                            | Eportfolio. Clinical Competencies module.                                                                                    | Clinical skills tutor, Senior Lecturer/Clinical Psychologist                           |
| Stress 1          | Small group discussion with online upload of group answers onto VLE (Moodle) and debrief in class. | Task for discussion in small groups: Consider the following questions and upload your answers onto your group forum on Moodle.<br>Q1. What are the signs of stress?<br>Q2. What are the sources of stress?                                                                                                                                                                                                                                                                                                  |                                                                                                                              | Senior Lecturer/Clinical Psychologist                                                  |
| Stress 2          | Experiential                                                                                       | Large group practice of a Benson tension-reduction relaxation exercise on the floor/mat                                                                                                                                                                                                                                                                                                                                                                                                                     |                                                                                                                              | Senior Lecturer/Clinical Psychologist                                                  |
| Stress 3          | Practical demonstration and discussion                                                             | Cognitive strategies: The ABC model                                                                                                                                                                                                                                                                                                                                                                                                                                                                         | <u>Assignment 1</u> : Design a stress management programme for a patient (described) presenting to you with signs of stress. | Senior Lecturer/Clinical Psychologist                                                  |
| Leadership 1      | Large group discussion and didactic presentation                                                   | Task for small group discussion: Consult relevant resources if desired and then upload your answers onto your group forum on Moodle.<br>Q1 What makes a good leader?                                                                                                                                                                                                                                                                                                                                        |                                                                                                                              | Senior Lecturer/Clinical Psychologist                                                  |

|              |                                                  |                                                                                                                                                                                                                                                                  |                                                                                                                   |                                       |
|--------------|--------------------------------------------------|------------------------------------------------------------------------------------------------------------------------------------------------------------------------------------------------------------------------------------------------------------------|-------------------------------------------------------------------------------------------------------------------|---------------------------------------|
|              |                                                  | Q2 Leadership skills are an important aspect of a doctor's personal and professional development.<br><b>What, in your group's opinion, are the ten most crucial personal attributes/characteristics which determine the effectiveness of doctors as leaders?</b> |                                                                                                                   |                                       |
| Leadership 2 | Large group discussion and didactic presentation | Leadership competencies. Individualised EI reports distributed and group feedback.                                                                                                                                                                               |                                                                                                                   | Senior Lecturer/Clinical Psychologist |
| Leadership 3 | PowerPoint presentation and discussion.          | Tips to develop emotional competencies                                                                                                                                                                                                                           | <u>Assignment 2:</u> Discuss your EI profile using a SWOT analysis (strengths/weaknesses/opportunities / threats) | Senior Lecturer/Clinical Psychologist |
